# Supplementary material for: Confined-space synthesis of hierarchical SnO2nanorods assembled by ultrasmall nanocrystals for energy storage
Source: Royal Society of Chemistry journal article supplement (doi:10.1039/c6ra18039f), 2016-01-01
Supplement: c6ra18039f1.pdf [file c6ra18039f1.pdf]

## Supporting Information

### Confined-Space Synthesis of Hierarchical SnO<sub>2</sub> Nanorods Assembled by Ultrasmall Nanocrystals for Energy Storage

Menghu Wang, Hang Ping, Hao Xie, Baoli Chen, Min Yan, Weijian Fang, and Zhengyi Fu

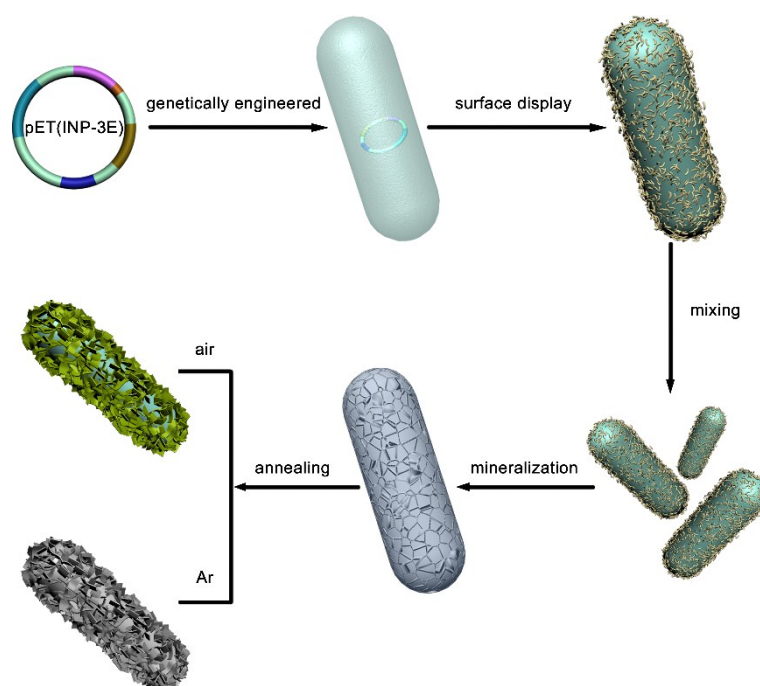

Figure S1. Scheme of strategy for confined space synthesis.

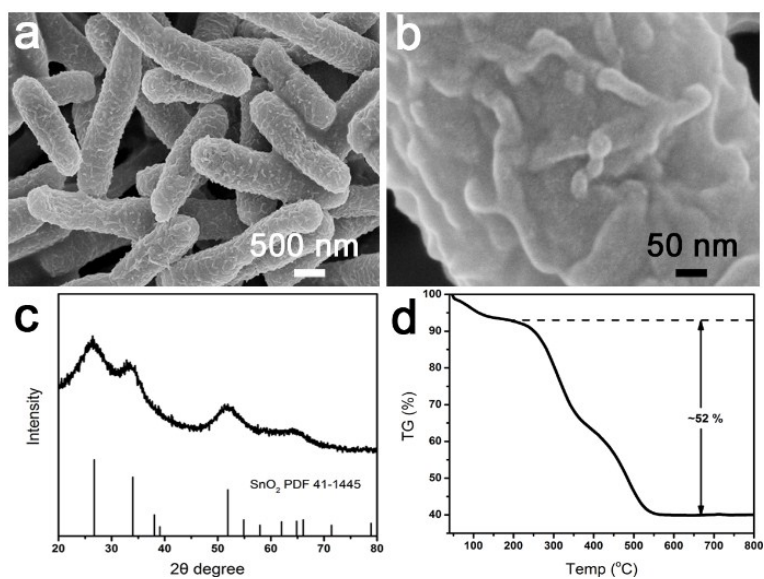

Figure S2. Mineralization of genetically engineered bacteria at 37 °C for 24 hours. (a) Low and (b) high magnification SEM image of mineralized bacteria. (c) XRD pattern. (d) TG curves.

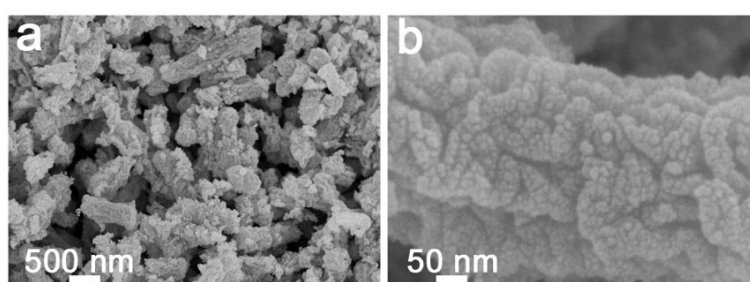

Figure S3. (a) Low and (b) high magnification SEM images of INP-modified product annealed at 600 °C in air.

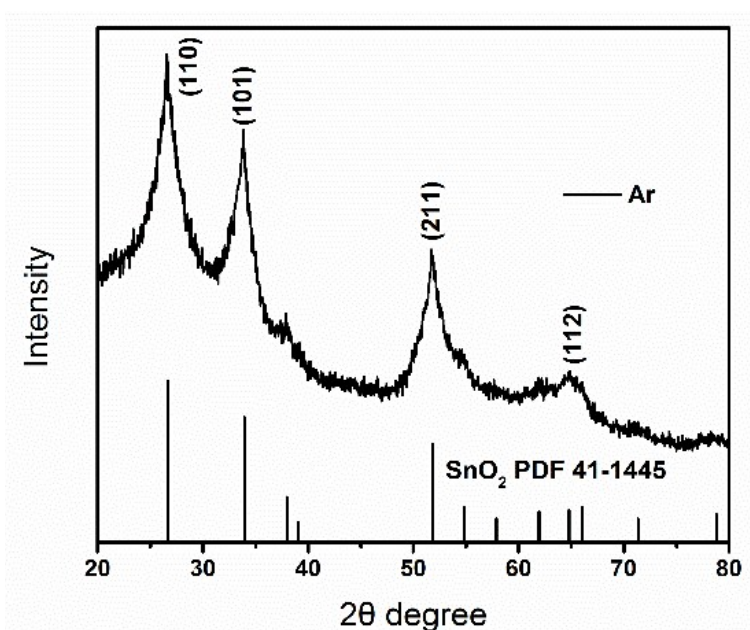

Figure S4. XRD pattern of SnO<sub>2</sub>/C.

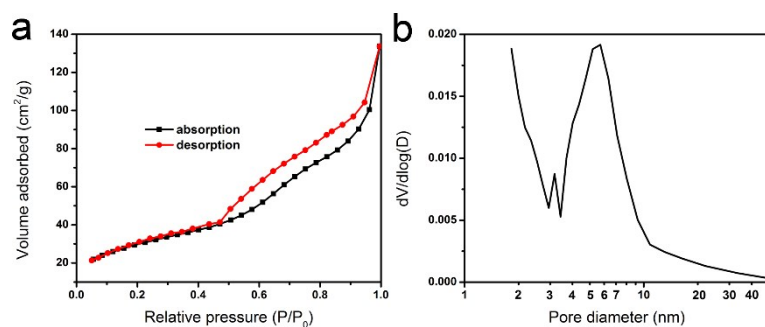

Figure S5. (a) Nitrogen adsorption and desorption isotherms and (b) pore size distribution of SnO<sub>2</sub>/C.

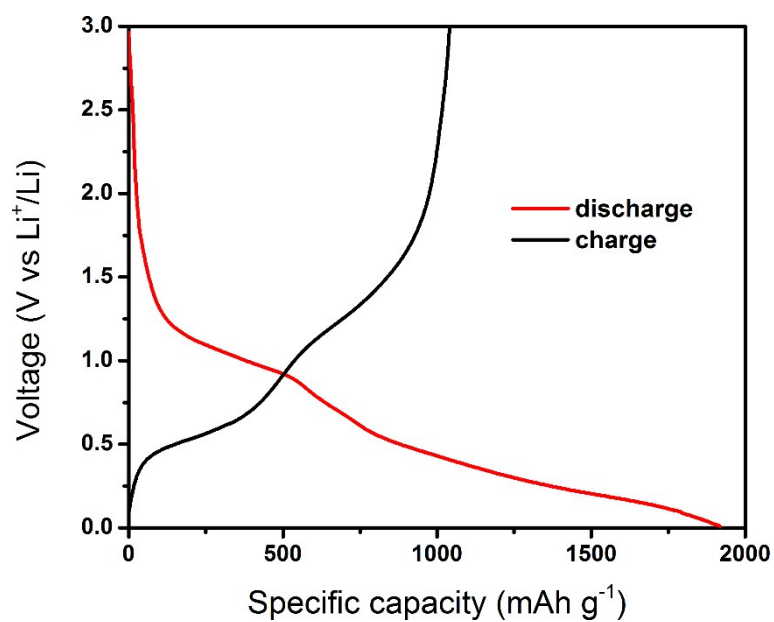

Figure S6. Charge-discharge voltage profiles of SnO<sub>2</sub>/C electrode of the first cycle at a current rate of 0.2 A g<sup>-1</sup>.

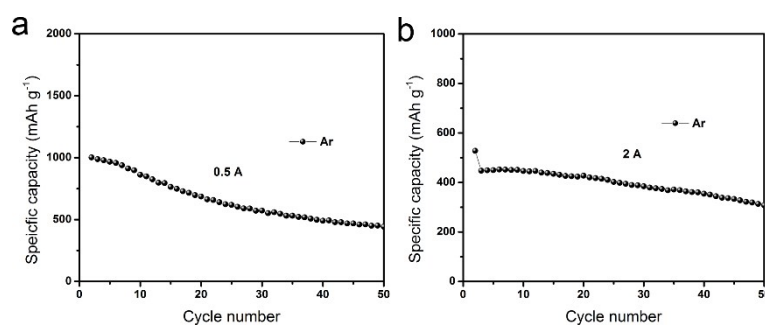

Figure S7. Cycling performance of SnO<sub>2</sub>/C electrode at current rates of 0.5 A g<sup>-1</sup> (a) and 2 A g<sup>-1</sup> (b).

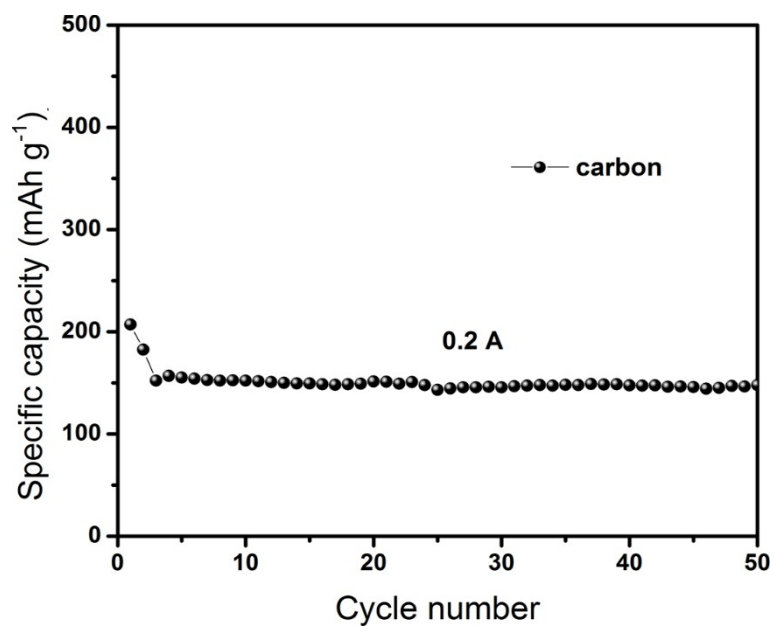

Figure S8. Cycling performance of carbon at a current rate of 0.2 A g<sup>-1</sup>.

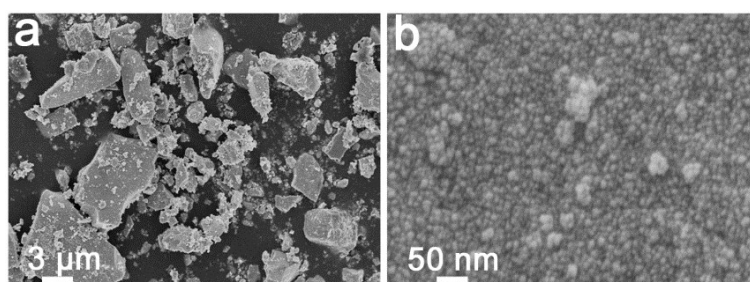

Figure S9. (a) Low and (b) high magnification SEM images of commercial 8 nm SnO<sub>2</sub> powder.

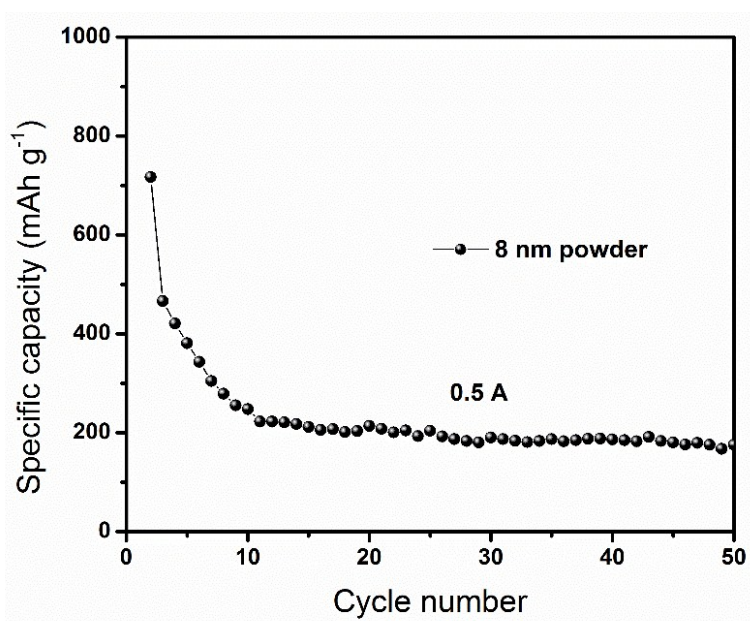

Figure S10. Cycling performance of commercial powder electrode at a current rate of 0.5 A g<sup>-1</sup>.

Table S1. Comparison of electrochemical performance of various SnO<sub>2</sub> based materials.

| Electrode materials                                     | Surface area (m <sup>2</sup> g <sup>-1</sup> ) | Specific capacity (mA h g <sup>-1</sup> ) | Discharge rate (mA g <sup>-1</sup> ) | References |
|---------------------------------------------------------|------------------------------------------------|-------------------------------------------|--------------------------------------|------------|
| SnO <sub>2</sub> nanosheets                             | 183.3                                          | 534 (after 50 cycles)                     | 156                                  | S1         |
| Long SnO <sub>2</sub> nanotubes                         | 213                                            | 468 (after 30 cycles)                     | 100                                  | S2         |
| SnO <sub>2</sub> nanoboxes                              | 60                                             | 570 (after 40 cycles)                     | 156                                  | S3         |
| SnO <sub>2</sub> nanowires                              | —                                              | 270 (after 50 cycles)                     | 100                                  | S4         |
| Bowl-like SnO <sub>2</sub> @carbon hollow particles     | 103.8                                          | 963 (after 100 cycles)                    | 400                                  | S5         |
| Ordered network of interconnected SnO <sub>2</sub>      | 87                                             | 564 (after 100 cycles)                    | 390                                  | S6         |
| SnO <sub>2</sub> nanocrystals + N-doped grapheme sheets | —                                              | 1346 (after 500 cycles)                   | 500                                  | S7         |
| Ultra-uniform SnOx + carbon nanohybrids                 | —                                              | 608 (after 200 cycles)                    | 500                                  | S8         |
| SnO <sub>2</sub> -Graphene Aerogel                      | 365                                            | 1299 (after 500 cycles)                   | 500                                  | S9         |
| Graphene-based mesoporous SnO <sub>2</sub>              | 251.7                                          | 847 (after 50 cycles)                     | 78                                   | S10        |
| N-doped grapheme-SnO <sub>2</sub> sandwich              | —                                              | 910 (after 50 cycles)                     | 50                                   | S11        |
| Carbon coated SnO <sub>2</sub> nanorod                  | 106                                            | 520 (after 50 cycles)                     | 200                                  | Our work   |

#### Supplementary References

- S1. C. Wang, G. H. Du, K. Stahl, H. X. Huang, Y. J. Zhong and J. Z. Jiang, *J. Phys. Chem. C*, 2012, 116, 4000-4011.
- S2. J. F. Ye, H. J. Zhang, R. Yang, X. G. Li and L. M. Qi, *Small*, 2010, 6, 296-306.
- S3. Z. Y. Wang, D. Y. Luan, F. Y. C. Boey and X. W. Lou, *J. Am. Chem. Soc.*, 2011, 133, 4738-4771.
- S4. M. S. Park, G. X. Wang, Y. M. Kang, D. Wexler, S. X. Dou and H. K. Liu, *Angew. Chem. Int. Ed.*, 2007, 46, 750-753.
- S5. J. Liang, X. Y. Yu, H. Zhou, H. B. Wu, S. J. Ding and X. W. Lou, *Angew. Chem. Int. Ed.*, 2014, 53, 12803-12807.
- S6. V. Etacheri, G. A. Seisenbaeva, J. Caruthers, G. Daniel, J. M. Nedelec, V. G. Kessler and V. G. Pol, *Adv. Energy Mater.*, 2015, 5, 1401289.
- S7. X. S. Zhou, L. J. Wan and Y. G. Guo, *Adv. Mater.*, 2013, 25, 2152-2157.
- S8. X. S. Zhou, Z. H. Dai, S. H. Liu, J. C. Bao and Y. G. Guo, *Adv. Mater.*, 2014, 26, 3943-3949.
- S9. Z. Li, J. Ding, H. L. Wang, K. Cui, T. Stephenson, D. Karpuzov and D. Mitlin, *Nano Energy*, 2015, 15, 369-378.
- S10. S. Yang, W. B. Yue, J. Zhu, Y. Ren and X. J. Yang, *Adv. Funct. Mater.*, 2013, 23, 3570-3576.
- S11. X. Wang, X. Q. Cao, L. Bourgeois, H. Guan, S. M. Chen, Y. Zhong, D. M. Tang, H. Q. Li, T. Y. Zhai, L. Li, Y. Bando and D. Golberg, *Adv. Funct. Mater.*, 2012, 22, 2682-2690.
